# Supplementary material for: Sensitive quantification and visual detection of bacteria using CdSe/ZnS@SiO2 nanoparticles as fluorescent probes
Source: Royal Society of Chemistry journal article supplement (doi:10.1039/c4ay01257g), 2014-01-01
Supplement: c4ay01257g1.pdf [file c4ay01257g1.pdf]

Table S1 Zeta potential data of CdSe/ZnS@SiO<sub>2</sub> and CdSe/ZnS @SiO<sub>2</sub>- NH<sub>2</sub>

| Sample                                      | Potential Distribution                                                             | ZetaPotential (mV) |
|---------------------------------------------|------------------------------------------------------------------------------------|--------------------|
| CdSe/ZnS @SiO <sub>2</sub>                  | 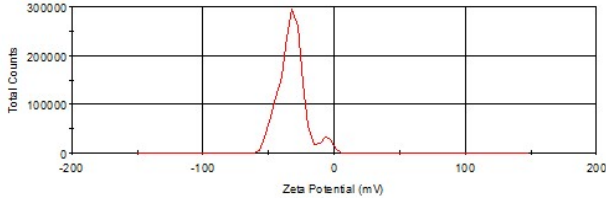 | -31.9 ± 4.1        |
| CdSe/ZnS@SiO <sub>2</sub> - NH <sub>2</sub> |  | -2.56 ± 3.3        |
